# Supplementary material for: Insights into the biosynthesis pathway of phenolic compounds in microalgae
Source: PubMed Central journal article supplement (PMC9052079; doi:10.1016/j.csbj.2022.04.019), 2022-04-20

Tree scale: 1

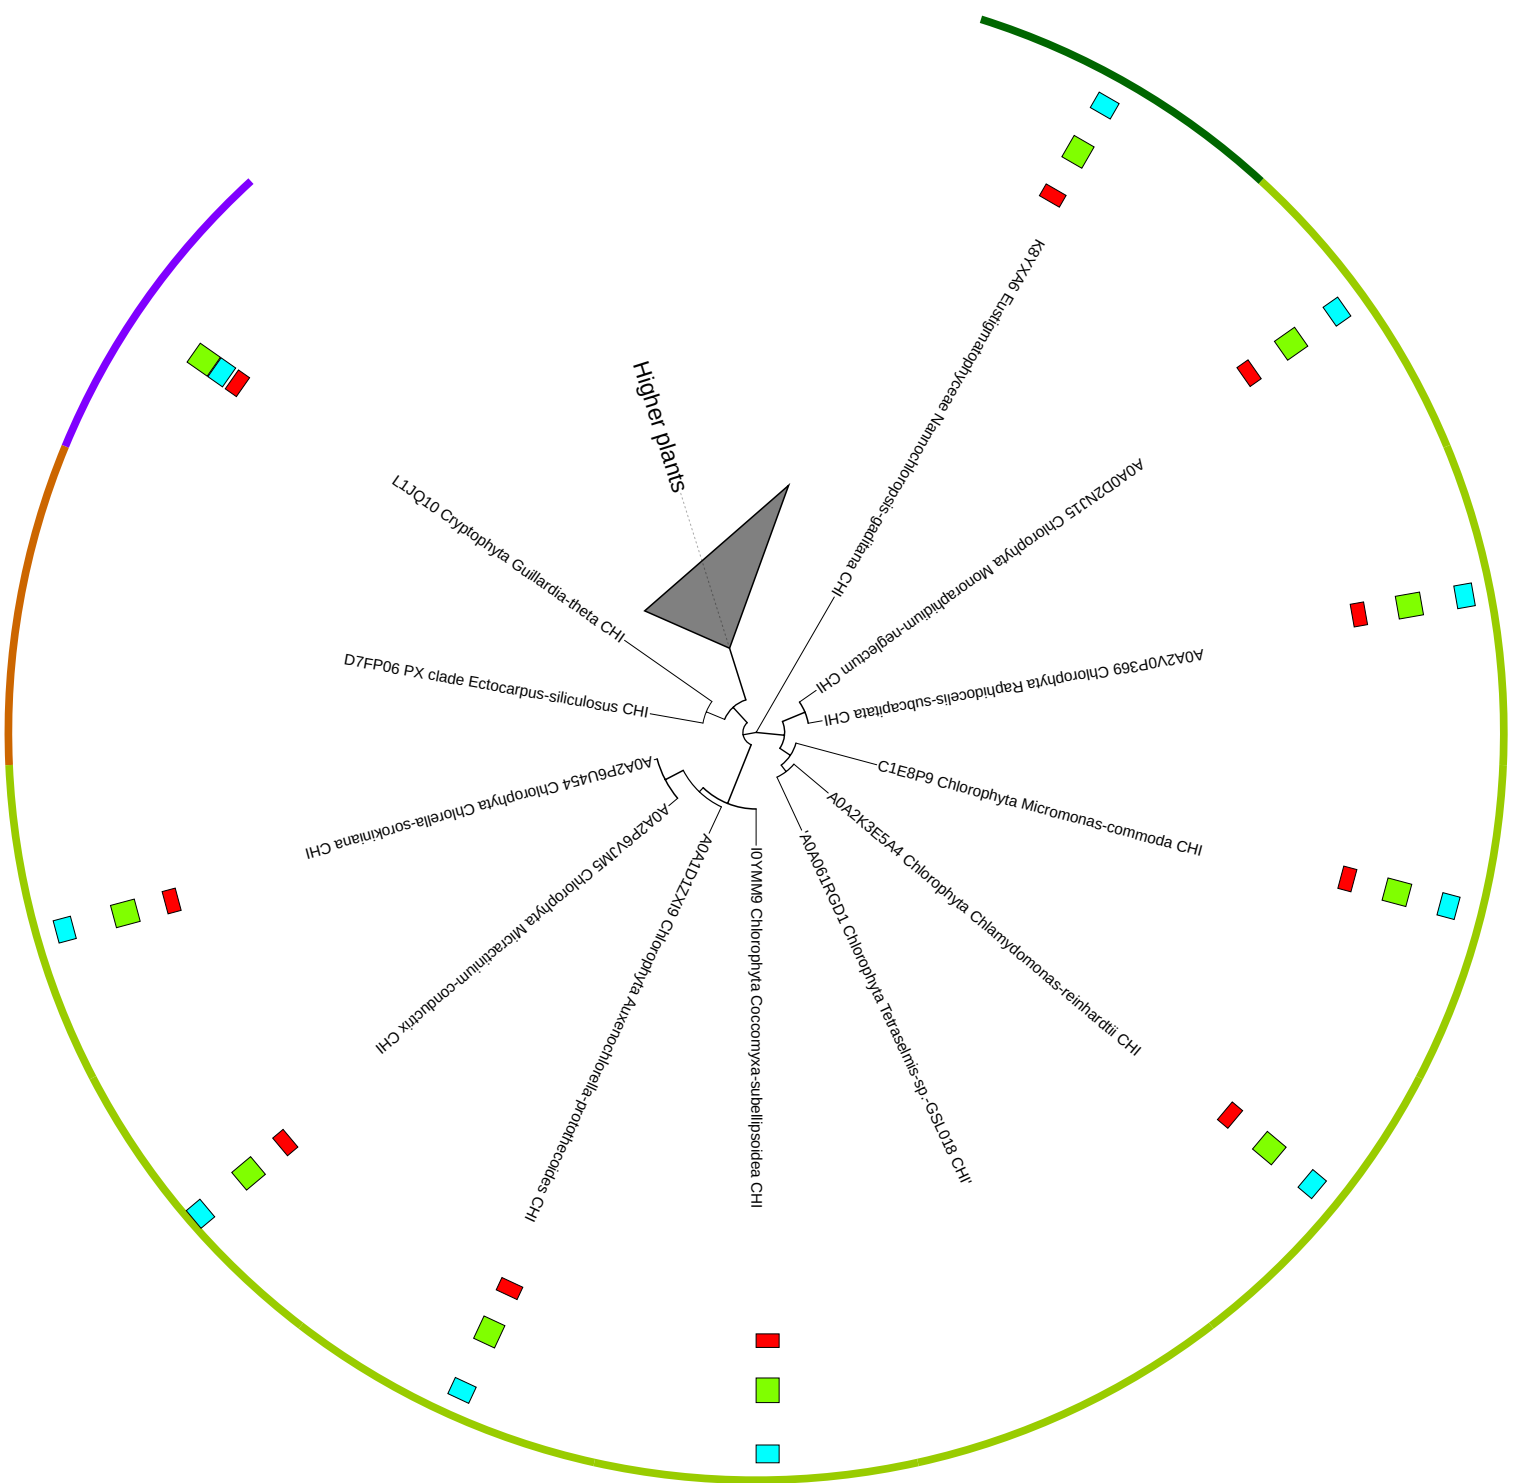

Supplement: mmc3.pdf [file mmc3.pdf]
