# Supplementary material for: Insights into the biosynthesis pathway of phenolic compounds in microalgae
Source: PubMed Central journal article supplement (PMC9052079; doi:10.1016/j.csbj.2022.04.019), 2022-04-20
Supplement: mmc6.pdf [file mmc6.pdf]

Tree scale: 1

- ANR acting on the CH-CH group of donors
- F2H acting on the CH-CH group of donors
- FNS acting on paired donors, with incorporation or reduction of molecular oxygen
- F3H acting on paired donors, with incorporation or reduction of molecular oxygen
- FLS acting on paired donors, with incorporation or reduction of molecular oxygen
- C3H acting on paired donors, with incorporation or reduction of molecular oxygen
- ANS acting on paired donors, with incorporation or reduction of molecular oxygen
- IFS acting on paired donors, with incorporation or reduction of molecular oxygen
- CMH acting on paired donors, with incorporation or reduction of molecular oxygen
